# Supplementary material for: Application of Multipoint DC Voltage Control in VSC-MTDC System
Source: Hindawi journal article supplement (doi:10.1155/2013/257387), 2013-01-01
Supplement: f1 [file 257387.f1.pdf]

# 2012 年中国风电装机容量统计

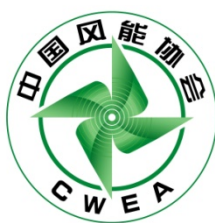

中国可再生能源学会风能专业委员会

2013 年 3 月

## 特别声明

1. 本报告版权归“中国可再生能源学会风能专业委员会（中国风能协会，Chinese Wind Energy Association, CWEA）”所有，未经事先书面授权，任何个人和机构不得对本报告进行任何形式的发布、复制。如引用，需注明出处为“中国可再生能源学会风能专业委员会”或“中国风能协会”，且不得对本报告进行有悖原意的删节和修改。
2. 本统计数据来源于风电机组制造商，虽与各方核实，但对于项目数据的绝对真实性和准确性本专委会不作任何保证。
3. 报告中的信息不构成投资、法律、会计或税务的最终操作建议，本专委会不就报告中的内容对最终操作建议作任何担保。

## 统计说明

1. 自 2012 年 12 月末至 2013 年 2 月，中国可再生能源学会风能专业委员会对“2012 年中国风电装机情况”进行了调研和统计，具体统计时期为：2012 年 1 月 1 日至 2012 年 12 月 31 日。统计基础数据来源于风电机组制造商，具体的项目信息与各风电机组制造商、风电场开发商以及各地发改委进行了核对，并对部分项目进行了现场核对，以期保证统计信息的真实、准确。
2. 本统计中的“风电装机容量”是指风电场现场已完成吊装工程的风电机组容量，与风电并网装机容量及验收运行装机容量不同。
3. 关于数据误差。本统计虽与发改委、开发商等核实，但由于各统计存在不同时间截点、不同统计口径等问题，因此与开发商及相关政府管理部门的统计结果不完全一致。

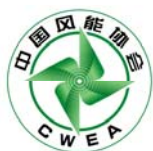

## 总体装机情况

2012 年，中国（不包括台湾地区）新增安装风电机组 7872 台，装机容量 12960MW，同比下降 26.5%；累计安装风电机组 53764 台，装机容量 75324.2MW，同比增长 20.8%。

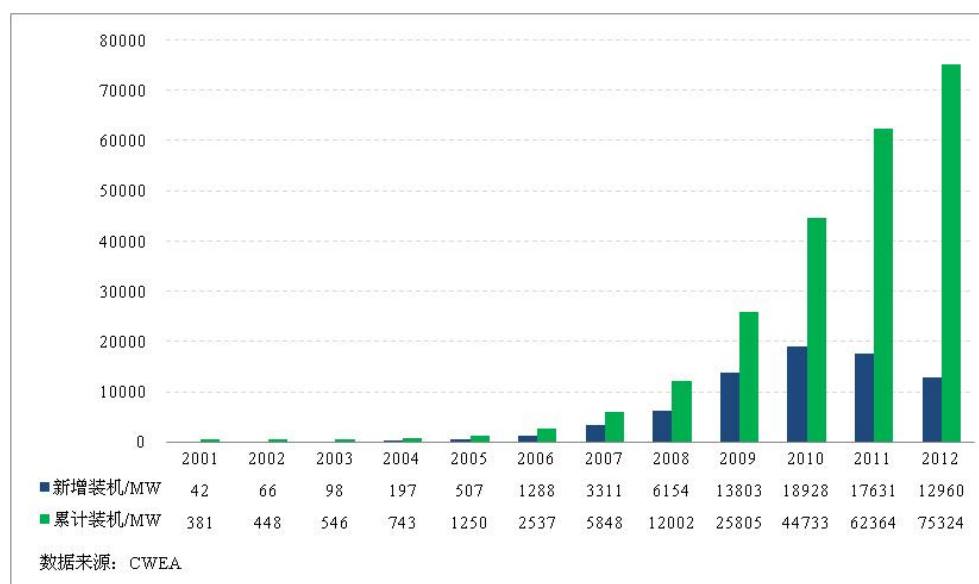

图 1 2001-2012 年中国新增及累计风电装机容量

## 区域装机情况

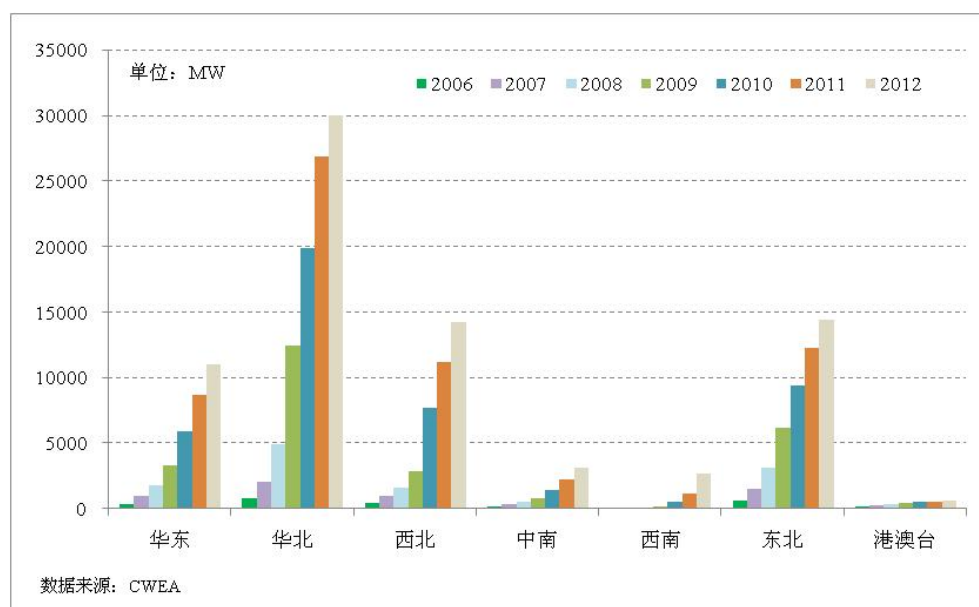

图 2 2006-2012 年中国各区域累计风电装机容量

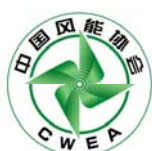

地址：北京市北三环东路 28 号易亨大厦 1108 室

邮编：100013

电话：010-59796665

传真：010-64228215

邮箱：info@cwea.org.cn

表 1 2012 年中国各省市新增及累计风电装机情况

| 序号  | 省（自治区、直辖市） | 2011 年累计/MW | 2012 年新增/MW | 2012 年累计/MW |
|-----|------------|-------------|-------------|-------------|
| 1   | 内蒙古        | 17504.4     | 1119.4      | 18623.8     |
| 2   | 河北         | 7070.0      | 908.8       | 7978.8      |
| 3   | 甘肃         | 5409.2      | 1069.8      | 6479.0      |
| 4   | 辽宁         | 5249.3      | 869.0       | 6118.3      |
| 5   | 山东         | 4562.3      | 1128.7      | 5691.0      |
| 6   | 黑龙江        | 3445.8      | 818.6       | 4264.4      |
| 7   | 吉林         | 3564.4      | 433.0       | 3997.4      |
| 8   | 宁夏         | 2875.7      | 690.0       | 3565.7      |
| 9   | 新疆         | 2316.1      | 990.0       | 3306.1      |
| 10  | 山西         | 1881.1      | 1026.0      | 2907.1      |
| 11  | 江苏         | 1967.6      | 404.5       | 2372.1      |
| 12  | 云南         | 932.3       | 1031.8      | 1964.0      |
| 13  | 广东         | 1302.4      | 388.9       | 1691.3      |
| 14  | 福建         | 1025.7      | 265.0       | 1290.7      |
| 15  | 陕西         | 497.5       | 212.0       | 709.5       |
| 16  | 贵州         | 195.1       | 312.0       | 507.1       |
| 17  | 安徽         | 297.0       | 197.0       | 494.0       |
| 18  | 河南         | 300.0       | 192.6       | 492.6       |
| 19  | 浙江         | 367.2       | 114.5       | 481.7       |
| 20  | 上海         | 318.0       | 34.0        | 352.0       |
| 21  | 海南         | 256.7       | 48.0        | 304.7       |
| 22  | 江西         | 133.5       | 154.0       | 287.5       |
| 23  | 天津         | 243.5       | 34.5        | 278.0       |
| 24  | 湖南         | 185.3       | 64.0        | 249.3       |
| 25  | 广西         | 79.0        | 124.5       | 203.5       |
| 26  | 湖北         | 100.4       | 93.5        | 193.9       |
| 27  | 青海         | 66.5        | 115.0       | 181.5       |
| 28  | 北京         | 155.0       | 0.0         | 155.0       |
| 29  | 重庆         | 46.8        | 57.6        | 104.4       |
| 30  | 四川         | 16.0        | 63.5        | 79.5        |
| 31  | 香港         | 0.8         | 0.0         | 0.8         |
| 汇 总 |            | 62364.2     | 12960.0     | 75324.2     |
| 32  | 台湾         | 564.05      | 57          | 621.05      |
| 总 计 |            | 62928.2     | 13017.0     | 75945.2     |

数据来源：CWEA

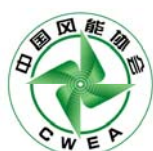

地址：北京市北三环东路 28 号易亨大厦 1108 室

邮编：100013

电话：010-59796665

传真：010-64228215

邮箱：info@cwea.org.cn

## 海上风电装机情况

2012 年, 中国海上风电新增装机 46 台, 容量达到 127MW, 其中潮间带装机量为 113MW, 占海上风电新增装机总量的 89%。

表 2 2012 年中国海上风电机组安装情况

| 省份  | 项目名称                           | 开发商   | 制造商  | 装机数量/台 | 装机容量/MW |
|-----|--------------------------------|-------|------|--------|---------|
| 山东  | 滨海海上风电项目一期                     | 国电    | 联合动力 | 1      | 3       |
|     | 潍坊实验风电场                        |       |      | 1      | 6       |
| 福建  | 福清海上风电项目样机                     | 福建投资  | 湘电风能 | 1      | 5       |
| 江苏  | 龙源如东潮间带项目                      | 龙源    | 重庆海装 | 2      | 10      |
|     | 龙源如东 15 万千瓦海上<br>(潮间带) 示范风电场   | 龙源    | 金风   | 20     | 50      |
|     | 龙源如东 15 万千瓦海上<br>(潮间带) 示范风电场增容 |       |      | 20     | 50      |
|     | 江苏响水潮间带 2×3MW<br>试验风机项目        | 长江新能源 | 金风   | 1      | 3       |
| 总 计 |                                |       |      | 46     | 127     |

数据来源: CWEA

截止 2012 年底, 中国已建成的海上风电项目共计 389.6MW, 是除英国、丹麦以外海上风电装机最多的国家。

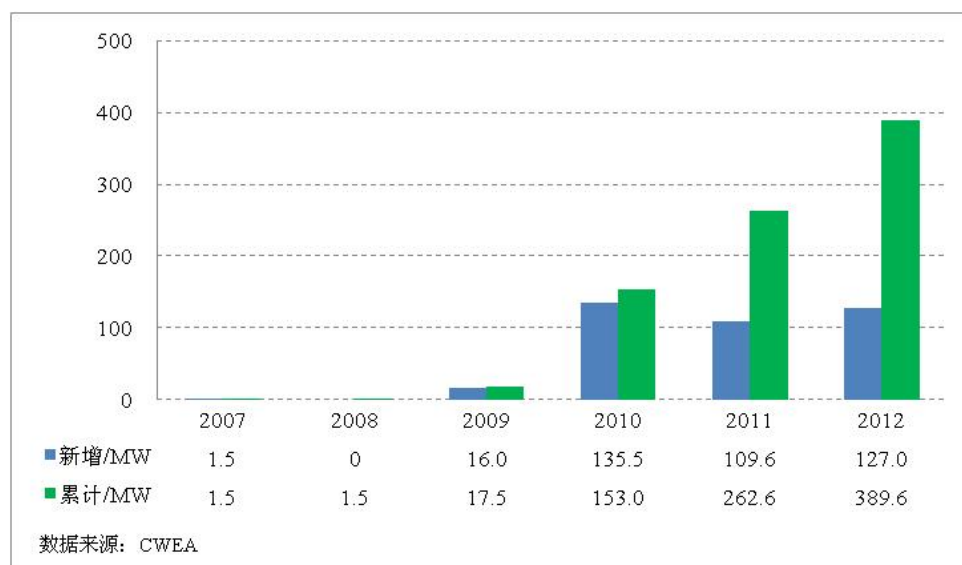

图 3 截止 2012 年底中国海上风电装机情况

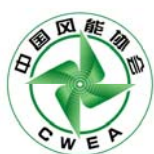

地址: 北京市北三环东路 28 号易亨大厦 1108 室

邮编: 100013

电话: 010-59796665

传真: 010-64228215

邮箱: info@cwea.org.cn

作为我国海上风电发展的一个重要组成部分，潮间带风电的开发进程较快。截止 2012 年底，我国潮间带风电装机容量达到 261.5MW，近海风电装机容量为 128.1MW，其中规模最大的近海风电项目为东海大桥海上项目（102MW），其余主要为各风电机组制造商安装的样机。

表 3 中国已建成的海上风电项目类型

| 类型    | 装机数量/台 | 装机容量/MW |
|-------|--------|---------|
| 潮间带风电 | 103    | 261.5   |
| 近海风电  | 41     | 128.1   |
| 总 计   | 144    | 389.6   |

数据来源：CWEA

为我国海上风电开发提供风电机组的制造商中，华锐、金风、Siemens 所占份额较大，机型主要以 2MW 以上的风电机组为主。其中华锐和 Siemens 的风电机组主要安装在近海风电项目，金风的风电机组主要安装在潮间带风电项目。

表 4 截止 2012 年底中国风电机组制造商的海上风电装机情况

| 序号  | 制造商     | 装机数量/台 | 装机容量/MW | 装机容量占比% |
|-----|---------|--------|---------|---------|
| 1   | 华锐      | 56     | 170.0   | 43.6    |
| 2   | 金风      | 44     | 109.5   | 28.1    |
| 3   | Siemens | 21     | 50.0    | 12.8    |
| 4   | 重庆海装    | 4      | 14.0    | 3.6     |
| 5   | 上海电气    | 6      | 13.6    | 3.5     |
| 6   | 联合动力    | 4      | 12.0    | 3.1     |
| 7   | 湘电风能    | 2      | 7.5     | 1.9     |
| 8   | 明阳      | 3      | 6.0     | 1.6     |
| 9   | 三一电气    | 2      | 4.0     | 1.0     |
| 10  | 远景能源    | 2      | 3.0     | 0.8     |
| 总 计 |         | 144    | 389.6   | 100     |

数据来源：CWEA



地址：北京市北三环东路 28 号易亨大厦 1108 室

邮编：100013

电话：010-59796665

传真：010-64228215

邮箱：info@cwea.org.cn

## 风电机组制造商装机情况

2012 年，中国风电新增装机容量排名前 20 的企业几乎占据了国内 98% 的市场份额，其中金风新增风电装机容量最多，达到 2521.5MW，占据 19.5% 的市场份额。2012 年，我国风电新增装机容量排名前 3 的企业分别为金风、联合动力和华锐。

表 5 2012 年中国风电新增装机排名前 20 的机组制造商

| 序号  | 制造商    | 装机台数 | 装机容量/MW | 装机容量占比/% |
|-----|--------|------|---------|----------|
| 1   | 金风     | 1600 | 2521.5  | 19.5     |
| 2   | 联合动力   | 1302 | 2029.0  | 15.7     |
| 3   | 华锐     | 699  | 1203.0  | 9.3      |
| 4   | 明阳     | 739  | 1133.5  | 8.7      |
| 5   | 湘电风能   | 445  | 893.0   | 6.9      |
| 6   | 上海电气   | 430  | 822.0   | 6.3      |
| 7   | 远景能源   | 328  | 544.0   | 4.2      |
| 8   | Gamesa | 265  | 493.2   | 3.8      |
| 9   | 东汽     | 311  | 466.5   | 3.6      |
| 10  | Vestas | 244  | 414.4   | 3.2      |
| 11  | 重庆海装   | 214  | 399.5   | 3.1      |
| 12  | 南车风电   | 252  | 385.8   | 3.0      |
| 13  | 运达     | 263  | 364.5   | 2.8      |
| 14  | 三一电气   | 166  | 275.0   | 2.1      |
| 15  | 华创     | 174  | 263.1   | 2.0      |
| 16  | 许继风电   | 86   | 172.0   | 1.3      |
| 17  | 华仪     | 76   | 114.0   | 0.9      |
| 18  | 中科天道   | 52   | 78.0    | 0.6      |
| 19  | GE     | 40   | 60.0    | 0.5      |
| 20  | 银河风电   | 23   | 57.5    | 0.4      |
| 其 它 |        | 163  | 270.5   | 2.1      |
| 总 计 |        | 7872 | 12960   | 100      |

数据来源：CWEA



地址：北京市北三环东路 28 号易亨大厦 1108 室

邮编：100013

电话：010-59796665

传真：010-64228215

邮箱：info@cwea.org.cn

表 6 2012 年中国风电累计装机排名前 20 的机组制造商

| 序号  | 制造商    | 装机台数  | 装机容量/MW | 装机容量占比/% |
|-----|--------|-------|---------|----------|
| 1   | 金风     | 12227 | 15200.4 | 20.2     |
| 2   | 华锐     | 9178  | 14180.0 | 18.8     |
| 3   | 东汽     | 4901  | 7364.5  | 9.8      |
| 4   | 联合动力   | 4801  | 7311.0  | 9.7      |
| 5   | 明阳     | 2802  | 4256.5  | 5.7      |
| 6   | Vestas | 3175  | 3979.9  | 5.3      |
| 7   | Gamesa | 3220  | 3279.1  | 4.4      |
| 8   | 湘电风能   | 1345  | 2694.5  | 3.6      |
| 9   | 上海电气   | 1582  | 2603.5  | 3.5      |
| 10  | GE     | 1082  | 1635.5  | 2.2      |
| 11  | 华创     | 1045  | 1571.1  | 2.1      |
| 12  | 运达     | 1429  | 1462.5  | 1.9      |
| 13  | 南车风电   | 823   | 1302.3  | 1.7      |
| 14  | 远景能源   | 827   | 1292.5  | 1.7      |
| 15  | 重庆海装   | 689   | 1274.8  | 1.7      |
| 16  | Suzlon | 649   | 901.3   | 1.2      |
| 17  | 三一电气   | 379   | 598.0   | 0.8      |
| 18  | Nordex | 471   | 574.2   | 0.8      |
| 19  | 华仪     | 450   | 560.1   | 0.7      |
| 20  | 银星能源   | 496   | 505.0   | 0.7      |
| 其 它 |        | 2193  | 2777.5  | 3.5      |
| 总 计 |        | 53764 | 75324.2 | 100      |

数据来源: CWEA



地址: 北京市北三环东路 28 号易亨大厦 1108 室

邮编: 100013

电话: 010-59796665

传真: 010-64228215

邮箱: info@cwea.org.cn

## 风电机组出口情况

2012 年, 我国共有 7 家风电机组制造商向国外出口风电机组, 已发运的数量达到 225 台, 容量为 430.45MW。

表 7 2012 年中国风电机组出口情况\*

| 序号  | 制造商  | 已发运数量/台 | 已发运容量/MW | 出口国家   |
|-----|------|---------|----------|--------|
| 1   | 华锐   | 36      | 54.00    | 土耳其    |
|     |      | 22      | 52.50    | 意大利    |
|     |      | 12      | 36.00    | 西班牙    |
|     |      | 23      | 34.50    | 巴西     |
|     | 小计   | 93      | 177.00   |        |
| 2   | 金风   | 26      | 43.00    | 美国     |
|     |      | 13      | 19.50    | 澳大利亚   |
|     |      | 11      | 16.50    | 厄瓜多尔   |
|     |      | 3       | 7.50     | 泰国     |
|     | 小计   | 54      | 87.25    | 乌兹别克斯坦 |
| 3   | 华创   | 17      | 61.20    | 美国     |
| 4   | 三一电气 | 25      | 50.00    | 美国     |
| 5   | 明阳   | 33      | 49.50    | 保加利亚   |
| 6   | 湘电风能 | 2       | 4.00     | 伊朗     |
| 7   | 浙江运达 | 1       | 1.50     | 伊朗     |
| 总 计 |      | 225     | 430.45   |        |

数据来源: CWEA

\*目前统计的风电机组出口情况主要针对我国内资和合资风电机组制造商, 外资风电机组制造商不包含在内。

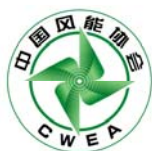

地址: 北京市北三环东路 28 号易亨大厦 1108 室

邮编: 100013

电话: 010-59796665

传真: 010-64228215

邮箱: info@cwea.org.cn

截止 2012 年底，我国风电机组制造商已出口的风电机组共计 407 台，总容量达到 700.15MW。与 2011 年相比，2012 年我国风电机组制造商在“走出去”方面取得明显突破。

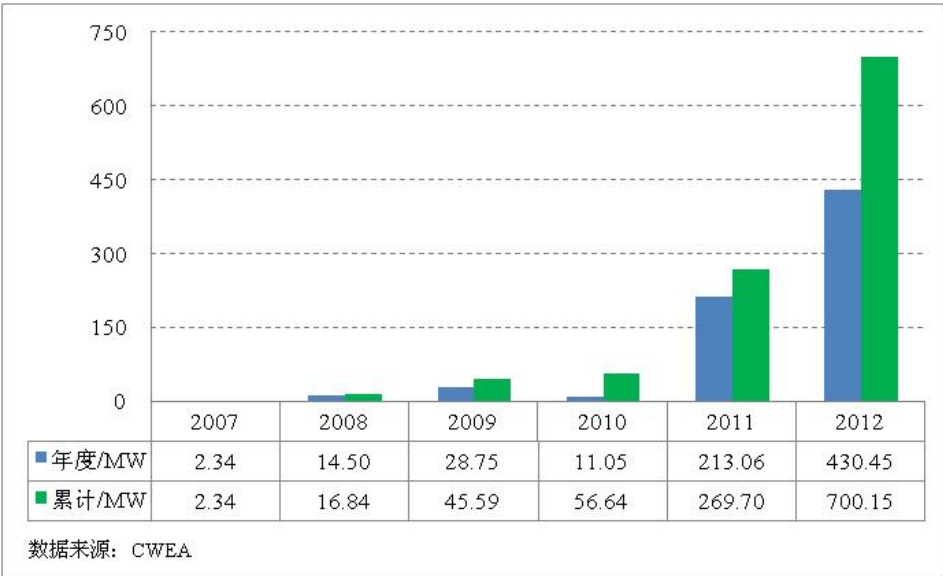

图 4 截止 2012 年底中国风电机组出口情况

近两年，我国风电机组制造商加快了海外市场的拓展步伐，风电机组出口国家从 2007 年的 1 个扩大到现在的 19 个，其中美国是最主要的风电机组出口国。截止 2012 年底，我国向美国出口的风电机组容量已达到 327.75MW，占出口总量的 46.8%。

表 8 截止 2012 年底中国风电机组出口国家情况

| 序号 | 出口国家  | 台数  | 容量/MW  | 序号 | 出口国家   | 台数  | 容量/MW  |
|----|-------|-----|--------|----|--------|-----|--------|
| 1  | 美国    | 182 | 327.75 | 11 | 泰国     | 7   | 13.00  |
| 2  | 土耳其   | 36  | 54.00  | 12 | 瑞典     | 2   | 6.00   |
| 3  | 意大利   | 22  | 52.50  | 13 | 伊朗     | 3   | 5.50   |
| 4  | 保加利亚  | 34  | 51.50  | 14 | 智利     | 5   | 5.34   |
| 5  | 埃塞俄比亚 | 34  | 51.00  | 15 | 古巴     | 6   | 4.50   |
| 6  | 西班牙   | 12  | 36.00  | 16 | 英国     | 3   | 3.75   |
| 7  | 巴西    | 23  | 34.50  | 17 | 哈萨克斯坦  | 2   | 1.56   |
| 8  | 澳大利亚  | 13  | 19.50  | 18 | 白俄罗斯   | 1   | 1.50   |
| 9  | 厄瓜多尔  | 11  | 16.50  | 19 | 乌兹别克斯坦 | 1   | 0.75   |
| 10 | 印度    | 10  | 15.00  | 总计 |        | 407 | 700.15 |

数据来源: CWEA

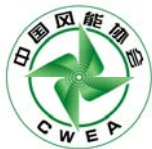

截止 2012 年底，风电机组制造商中，以金风和华锐的出口数量最多，容量分别达到 268.75MW 和 204MW，占出口总量的 38.38% 和 29.14%。

表 9 截止 2012 年底中国风电机组制造商出口情况

| 序号  | 制造商  | 已发运数量/台 | 已发运容量/MW | 容量占比/% |
|-----|------|---------|----------|--------|
| 1   | 金风   | 176     | 268.75   | 38.38  |
| 2   | 华锐   | 109     | 204.00   | 29.14  |
| 3   | 三一电气 | 31      | 62.00    | 8.86   |
| 4   | 华创   | 17      | 61.20    | 8.74   |
| 5   | 明阳   | 34      | 51.00    | 7.28   |
| 6   | 中航惠德 | 10      | 10.00    | 1.43   |
| 7   | 联合动力 | 6       | 9.00     | 1.29   |
| 8   | 华仪   | 8       | 8.40     | 1.20   |
| 9   | 上海电气 | 5       | 6.25     | 0.89   |
| 10  | 湘电风能 | 3       | 6.00     | 0.86   |
| 11  | 新誉重工 | 4       | 6.00     | 0.86   |
| 12  | 重庆海装 | 2       | 4.00     | 0.57   |
| 13  | 瑞祥风能 | 1       | 2.05     | 0.29   |
| 14  | 浙江运达 | 1       | 1.50     | 0.21   |
| 总 计 |      | 407     | 700.15   | 100    |

数据来源：CWEA

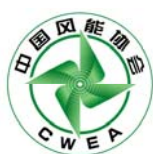

地址：北京市北三环东路 28 号易亨大厦 1108 室

邮编：100013

电话：010-59796665

传真：010-64228215

邮箱：info@cwea.org.cn

## 致谢名单（按拼音首字母排序）

|     |     |     |     |     |     |
|-----|-----|-----|-----|-----|-----|
| 陈文杰 | 陈小波 | 陈忠明 | 戴 佳 | 丁 坤 | 董赵威 |
| 杜宝春 | 冯德全 | 高 辉 | 葛立群 | 宫佳辉 | 韩 丽 |
| 兰 丹 | 李 钊 | 廖立赋 | 林建伟 | 刘海涛 | 刘 莉 |
| 刘祖明 | 鲁 影 | 鲁志平 | 陆纳科 | 罗明远 | 马学敏 |
| 马莹莹 | 冒洪生 | 邱 伟 | 曲立群 | 施永吉 | 宋 辉 |
| 孙洪刚 | 孙 鹏 | 孙晓蒙 | 汤玮梁 | 田红平 | 王 蕾 |
| 王 萌 | 王淑珍 | 王奕萱 | 肖洪波 | 熊细凯 | 严晟敏 |
| 阳 明 | 于钦奎 | 俞晓凌 | 余苑雅 | 于 毅 | 张 博 |
| 张海峰 | 张 军 | 张永源 | 张允水 | 赵海涛 | 赵明辉 |
| 甄 妮 | 郑洁平 |     |     |     |     |

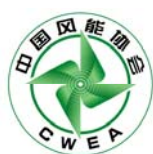

地址：北京市北三环东路 28 号易亨大厦 1108 室

邮编：100013

电话：010-59796665

传真：010-64228215

邮箱：info@cwea.org.cn
